# Supplementary material
Source: MDPI journal article supplement (https://www.mdpi.com/2073-445X/12/8/1551)
Supplement: s1 [file s1]

Archive with 2 entries (2 files):
- supplementary material S1_Indicators Ref List.pdf
- supplementary material S2_Results maps.pdf
