# Supplementary material
Source: MDPI journal article supplement (https://www.mdpi.com/2073-445X/12/8/1551)

Supplementary material S2 - maps and results:  
resulting maps of absolute values as reclassified values and the resulting expanded plans

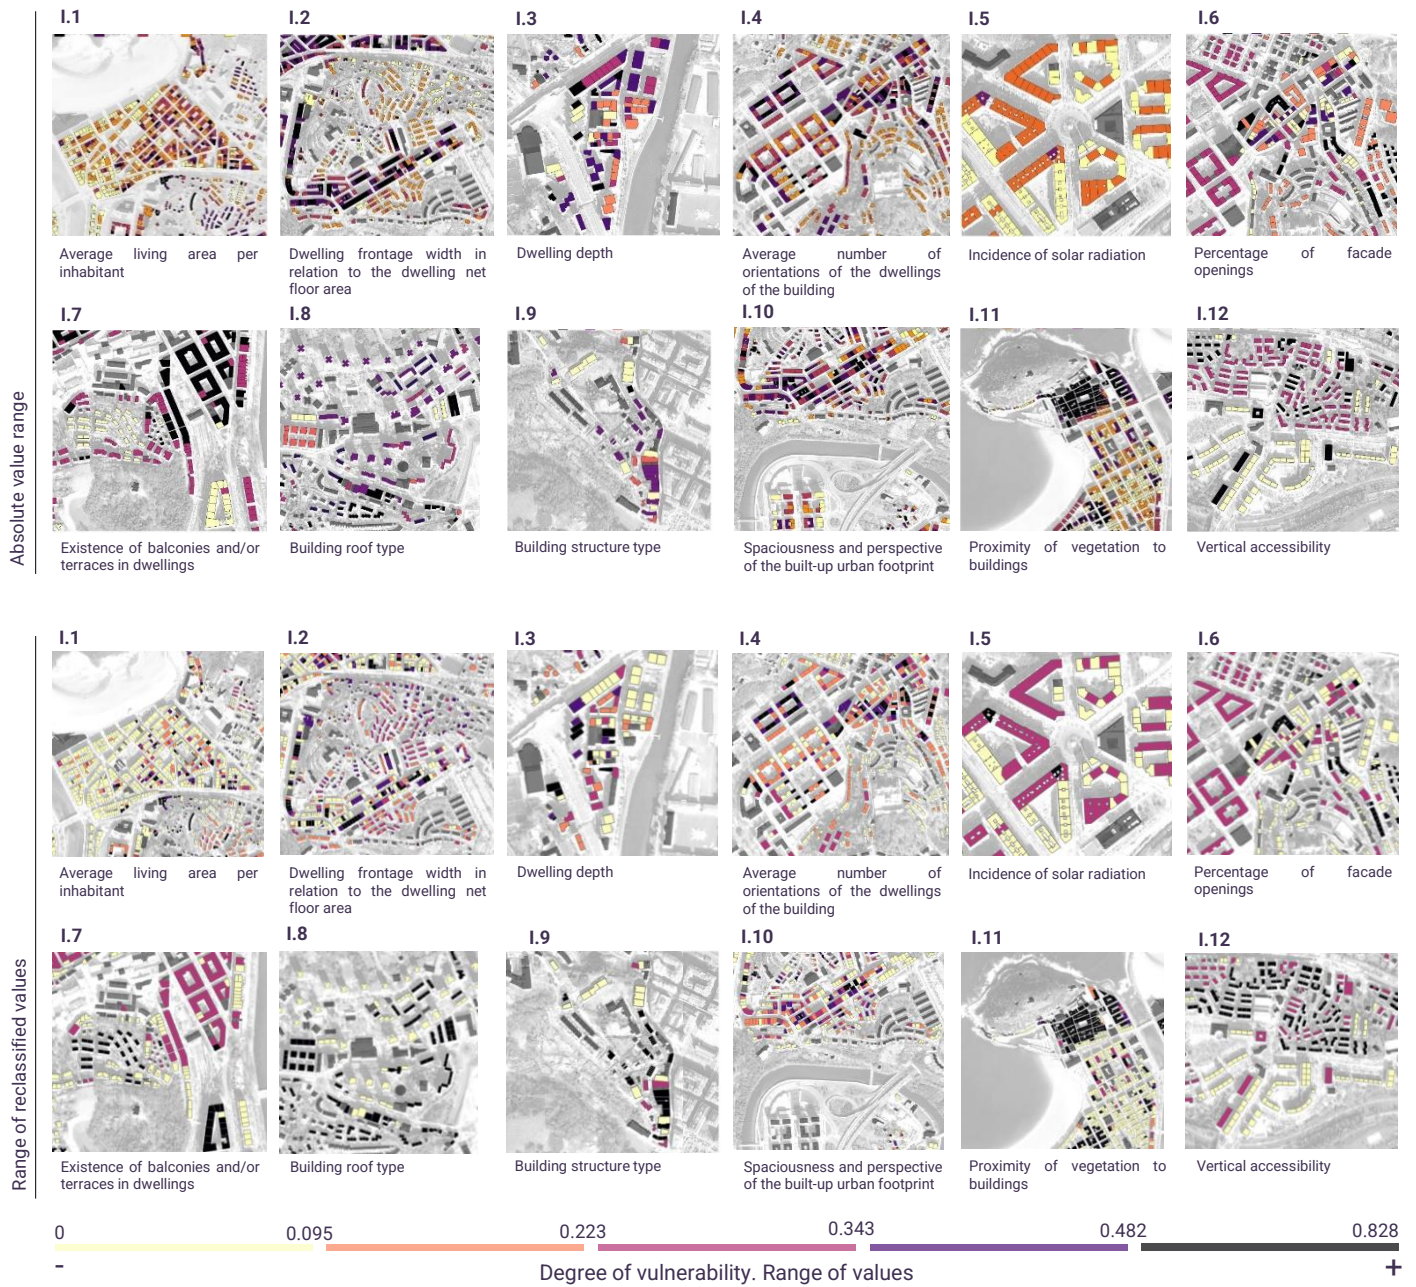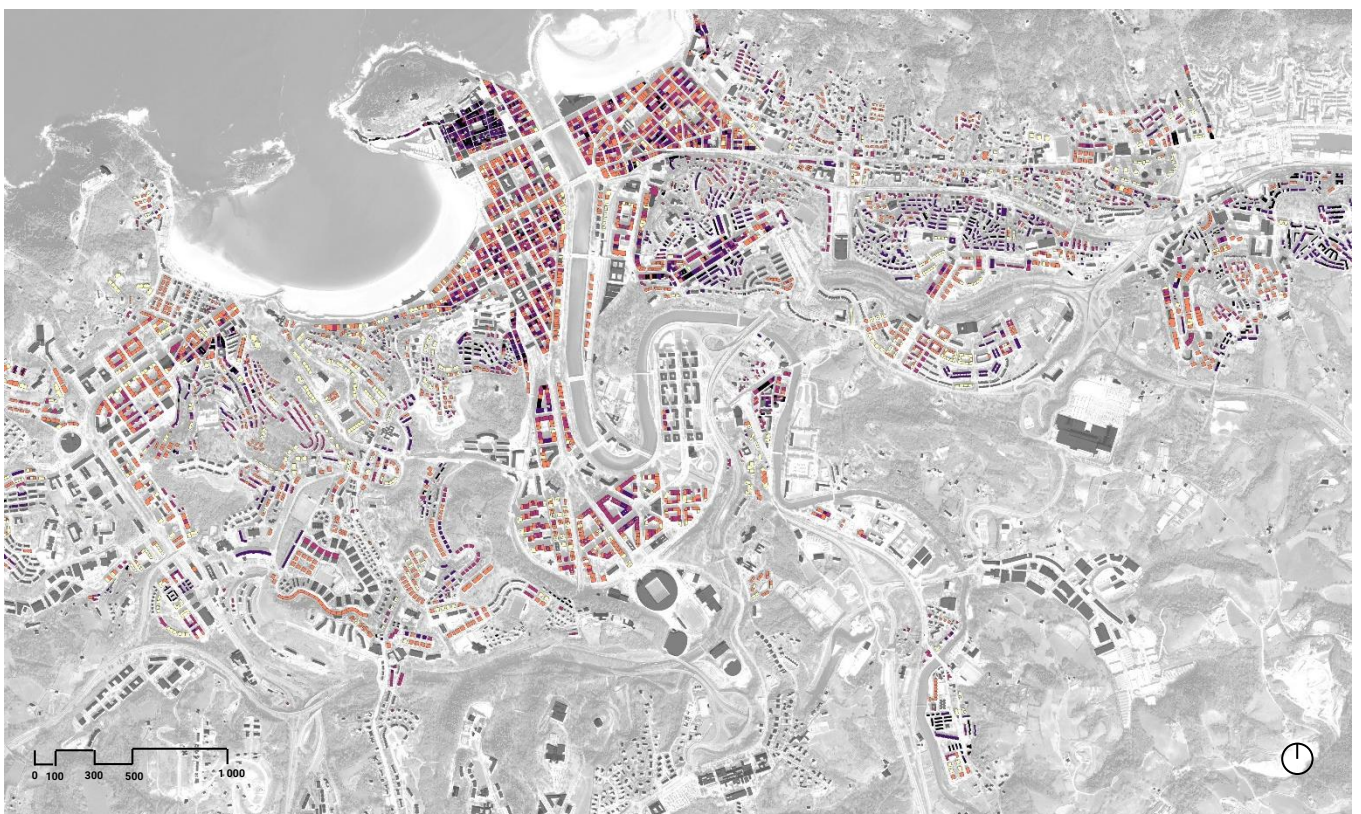



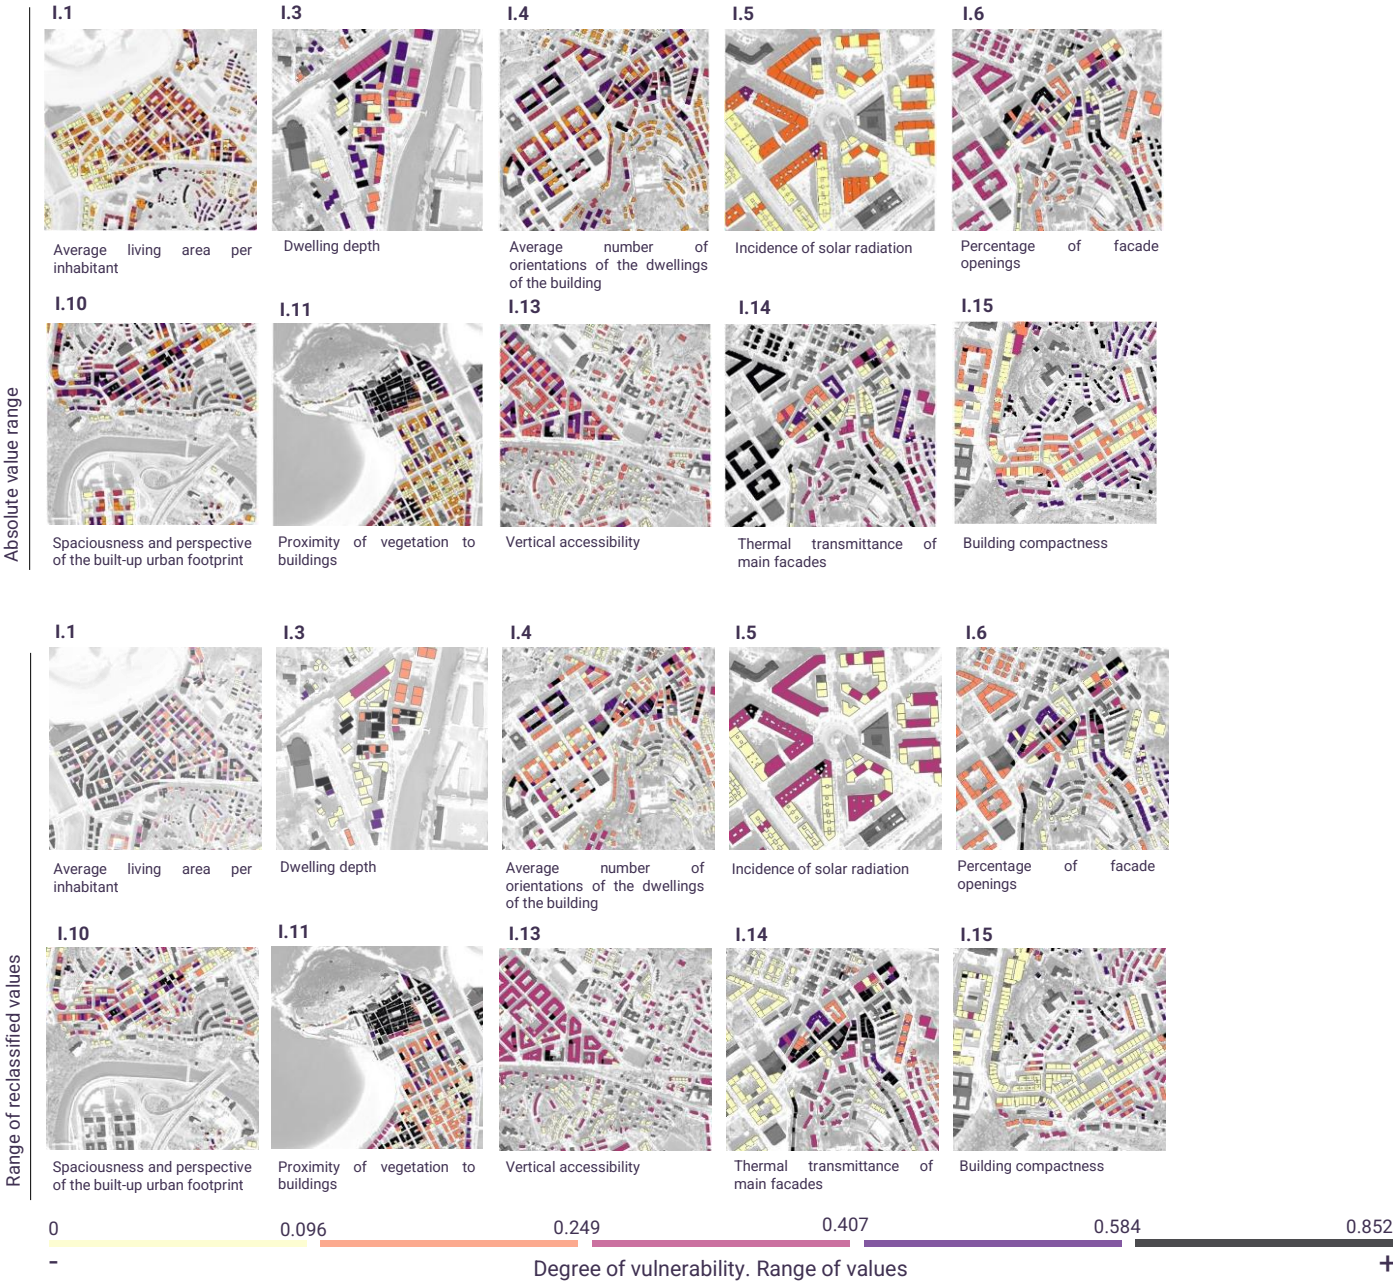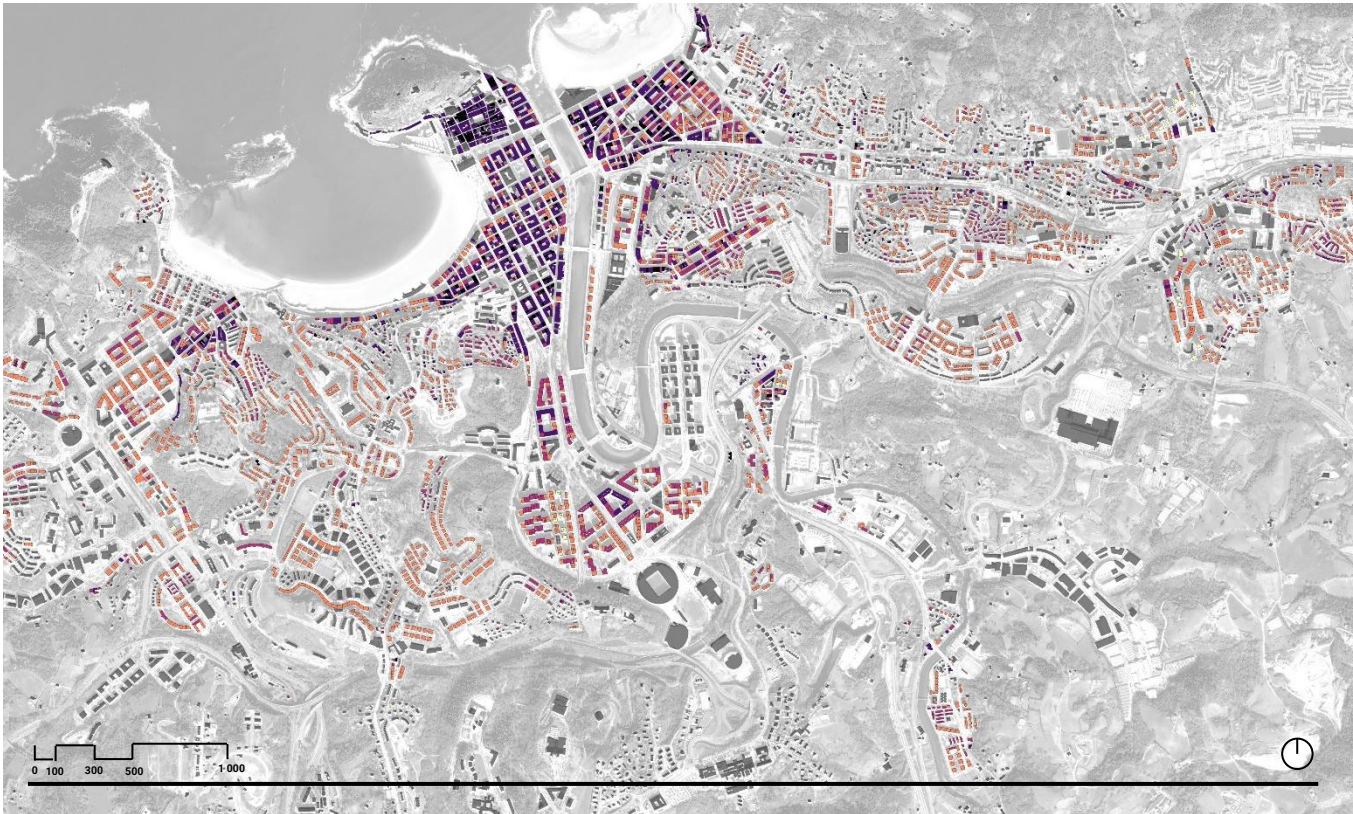



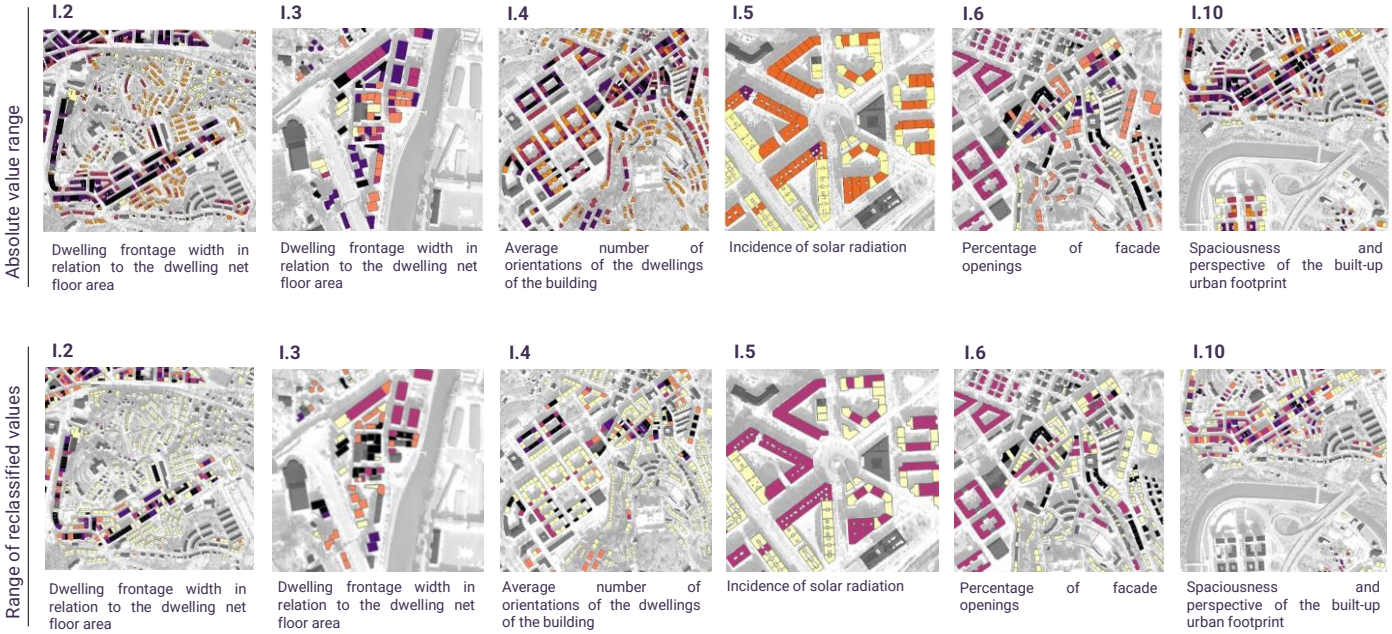



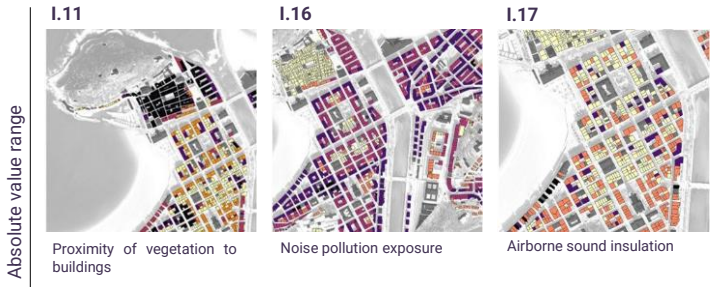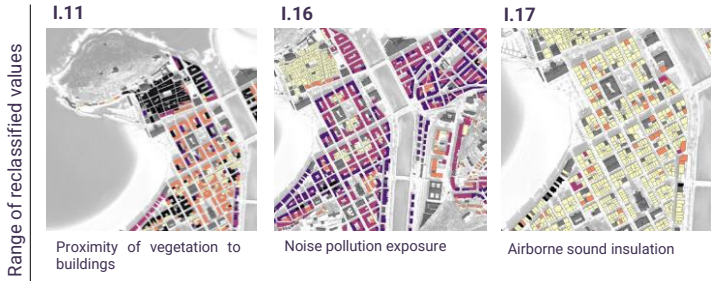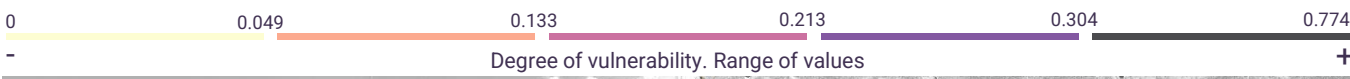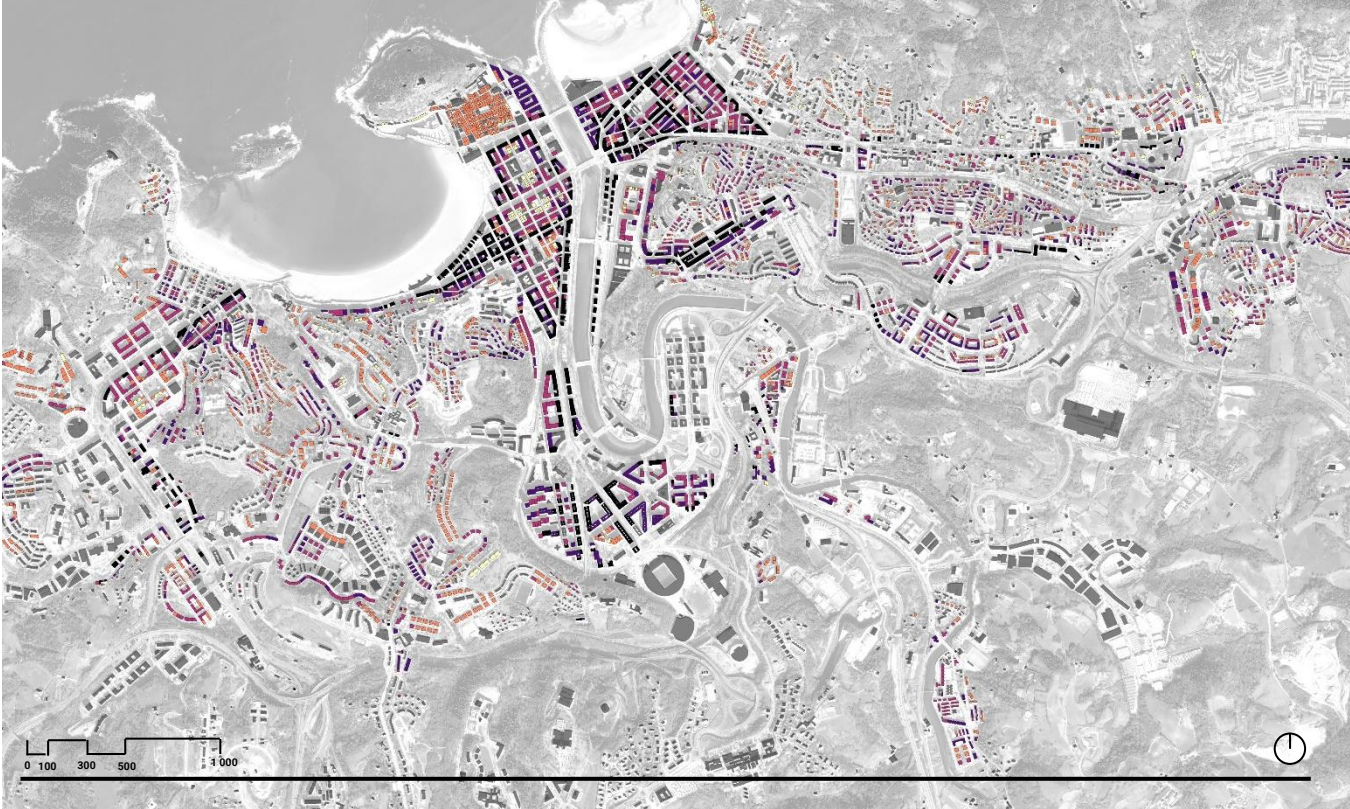



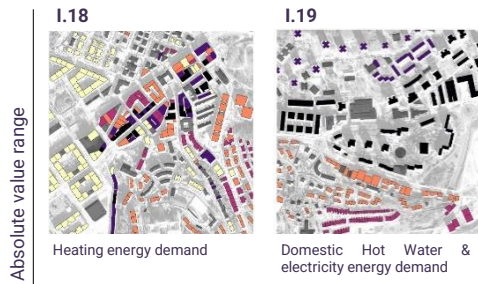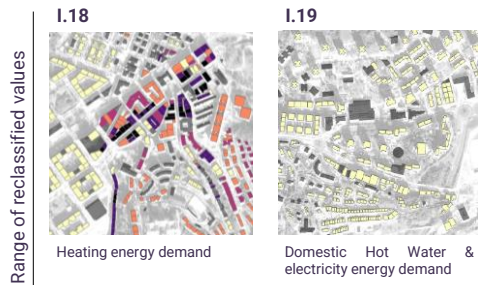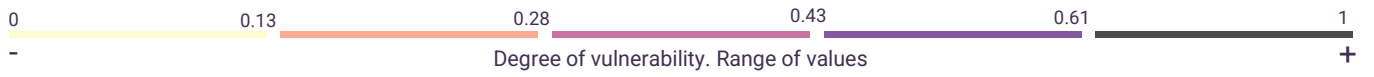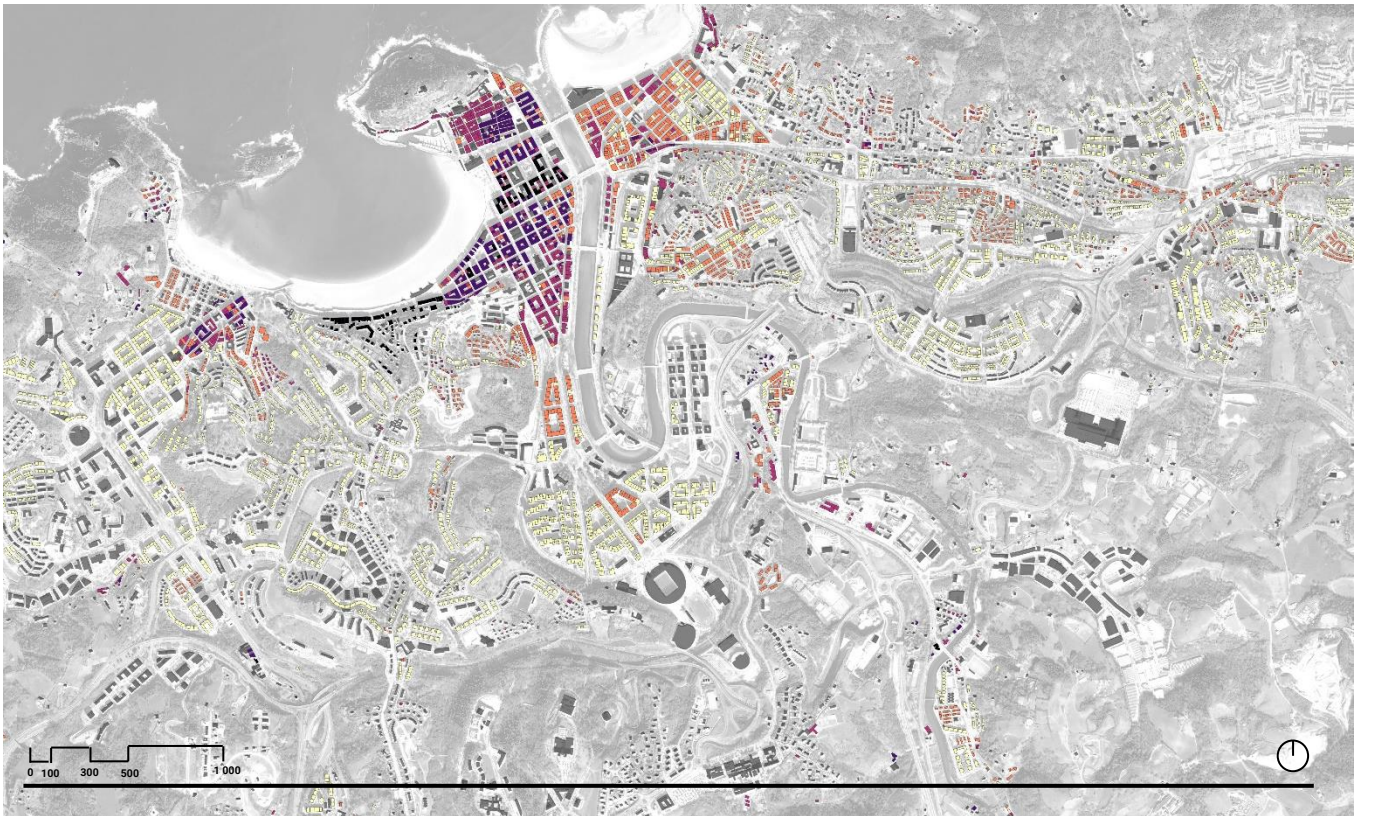



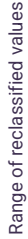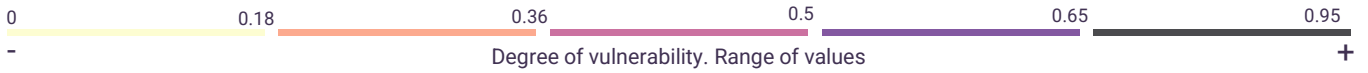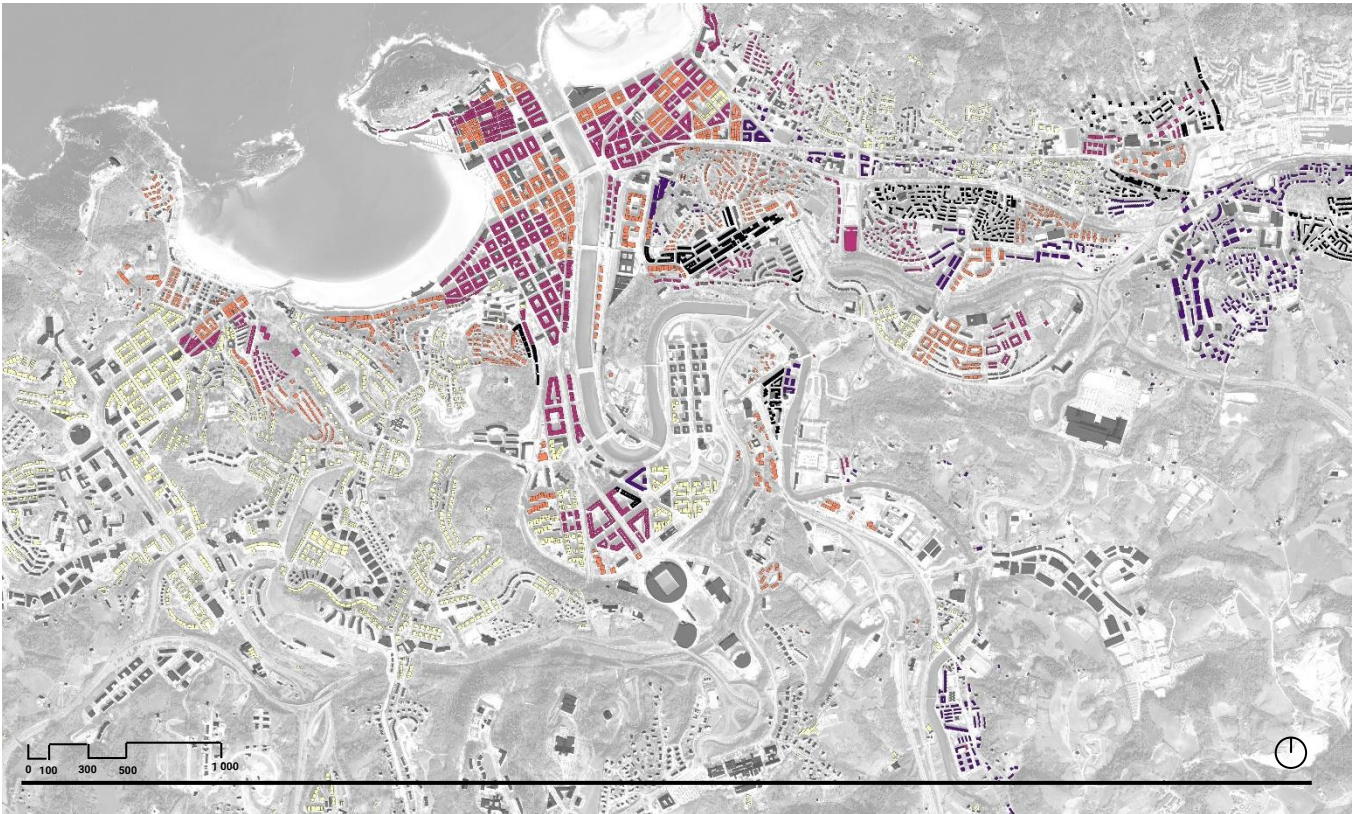

Supplement: s1 [file s1]
